# Supplementary material
Source: MDPI journal article supplement (https://www.mdpi.com/2504-2289/7/4/167)
Supplement: s1 [file s1]

Archive with 4 entries (4 files):
- supplemental_figure1.eps
- supplemental_figure2.eps
- supplemental_figure3.eps
- Table S1a and S1b for BDCC.pdf
