# Supplementary material
Source: MDPI journal article supplement (https://www.mdpi.com/2504-2289/7/4/167)
Supplement: s1 [file s1 › Table S1a and S1b for BDCC.pdf]

**Supplemental Table 1a.** Top 20 most important variables in the support vector machine (SVM) model for Black American (BA) Veterans, ranked by absolute value of variable weight in the model.

| <i>Type</i> | <i>Variable Definition</i>                                                                           | <i>Weight</i>  |
|-------------|------------------------------------------------------------------------------------------------------|----------------|
| Topic       | memory, cognitive, dementia, impairment, wife, loss, problems, donepezil, testing, mild, ...         | 0.454          |
| Demographic | Age (normalized to be between 0 and 1 with 0=65yrs and 1=85yrs)                                      | 0.237          |
| Diagnosis   | Memory loss/anemia (ICD9: 780.93; ICD10: R41.[1-3])                                                  | 0.144          |
| Topic       | weight, move, program, management, obesity, health, loss, bmi, risks, discussed, ...                 | <b>- 0.116</b> |
| Procedure   | CT HEAD/BRAIN, W/O DYE (CPT: 70450)                                                                  | 0.103          |
| Topic       | wife, home, reports, states, accompanied, spoke, husband, concerned, house, giving, ...              | 0.102          |
| Topic       | time, correct, point, work, back, score, points, state, clock, year, ...                             | 0.092          |
| Topic       | point, assistance, points, independently, score, total, shopping, batching, activities, ability, ... | 0.090          |
| Topic       | mri, brain, ct, head, acute, small, left, matter, intracranial, white, ...                           | 0.082          |
| Topic       | daughter, mh, home, father, spoke, family, br, states, lives, stated, ...                            | 0.082          |
| Topic       | nursing, rehab, home, placement, facility, care, va, nh, cnh, contract, ...                          | 0.071          |
| Diagnosis   | Mild cognitive impairment (ICD9: 331.83; ICD10: G31.84)                                              | 0.070          |
| Procedure   | VITAMIN B-12 (CPT: 82607)                                                                            | 0.066          |
| Diagnosis   | Psychotic disorder with hallucinations (ICD9: 293.82; ICD10: 294.[8,9], F06.[0,8])                   | 0.063          |
| Topic       | cva, stroke, weakness, sided, left, cerebralvascular, hemiparesis, residual, speech, accident, ...   | 0.062          |
| Topic       | wife, mrs, spouse, spoke, called, call, husband, stated, mr, home, ...                               | 0.062          |
| Topic       | walker, cane, gait, walking, ambulation, walk, rollator, ambulates, falls, difficulty, ...           | 0.058          |
| Topic       | tremor, parkinson, tremors, disease, hand, gait, mild, sinemet, pd, levodopa                         | 0.057          |
| Topic       | medication, pill, box, medications, taking, med, pills, meds, bottle, bottles, ...                   | 0.057          |
| Procedure   | SYPHILIS TEST NON-PREP QUAL (CPT: 86592)                                                             | 0.056          |

**Supplemental Table 1b.** Top 20 most important variables in the support vector machine (SVM) model for White American (WA) Veterans, ranked by absolute value of variable weight in the model.

| <i>Type</i> | <i>Variable Definition</i>                                                                            | <i>Weight</i> |
|-------------|-------------------------------------------------------------------------------------------------------|---------------|
| Topic       | memory, cognitive, dementia, impairment, wife, loss, problems, donepezil, testing, mild, ...          | 0.468         |
| Demographic | Age (normalized to be between 0 and 1 with 0=65yrs and 1=85yrs)                                       | 0.225         |
| Diagnosis   | Memory loss/anemia (ICD9: 780.93; ICD10: R41.[1-3])                                                   | 0.180         |
| Topic       | wife, home, reports, states, accompanied, spoke, husband, concerned, house, giving, ...               | 0.126         |
| Topic       | weight, move, program, management, obesity, health, loss, bmi, risks, discussed, ...                  | - 0.120       |
| Topic       | point, assistance, points, independently, score, total, shopping, batching, activities, ability, ...  | 0.117         |
| Topic       | mri, brain, ct, head, acute, small, left, matter, intracranial, white, ...                            | 0.102         |
| Topic       | time, correct, point, work, back, score, points, state, clock, year, ...                              | 0.100         |
| Topic       | tremor, parkinson, tremors, disease, hand, gait, mild, sinemet, pd, levodopa, ...                     | 0.087         |
| Procedure   | CT HEAD/BRAIN, W/O DYE (CPT: 70450)                                                                   | 0.082         |
| Topic       | daughter, mh, home, father, spoke, family, br, states, lives, stated, ...                             | 0.079         |
| Diagnosis   | Psychotic disorder with hallucinations (ICD9: 293.82, 294.[8,9]; ICD10: F06.[0,8])                    | 0.072         |
| Topic       | nursing, rehab, home, placement, facility, care, va, nh, cnh, contract, ...                           | 0.069         |
| Topic       | walker, cane, gait, walking, ambulation, walk, rollator, ambulates, falls, difficulty, ...            | 0.067         |
| Diagnosis   | Mild cognitive impairment (ICD9: 331.83; ICD10: G31.84)                                               | 0.065         |
| Topic       | memory, average, cognitive, test, range, impaired, functioning, performance, evaluation, testing, ... | 0.064         |
| Diagnosis   | Parkinson's disease (ICD9: 332.0; ICD10: G20., G21.4)                                                 | 0.062         |
| Topic       | injury, head, fall, fell, hit, back, ago, fracture, rib, trauma, ...                                  | 0.058         |
| Procedure   | SYPHILIS TEST NON-PREP QUAL (CPT: 86592)                                                              | 0.057         |
| Procedure   | VITAMIN B-12 (CPT: 82607)                                                                             | 0.055         |
